# Supplementary material
Source: Springer Nature journal article supplement (https://www.springermedizin.de/resource/supplementary/12985_2005_116_MOESM1_ESM.pdf/9607472)

GPCMV Genome: *Hind* III Restriction Map

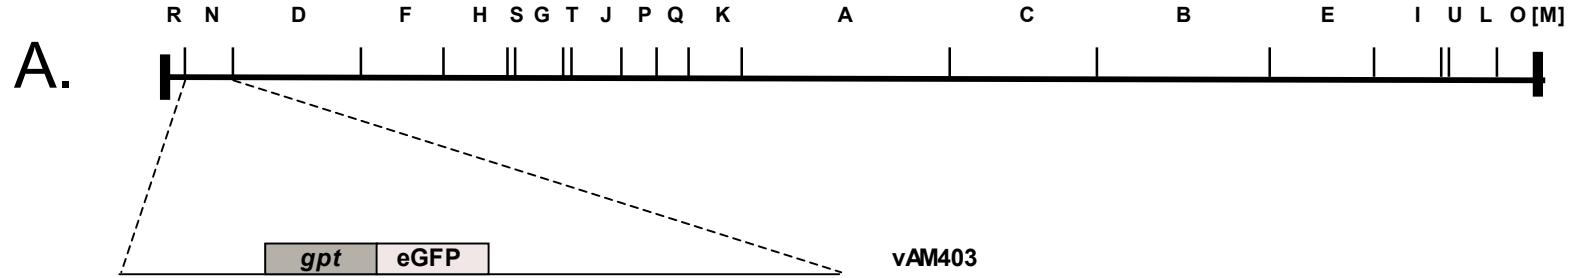

B.

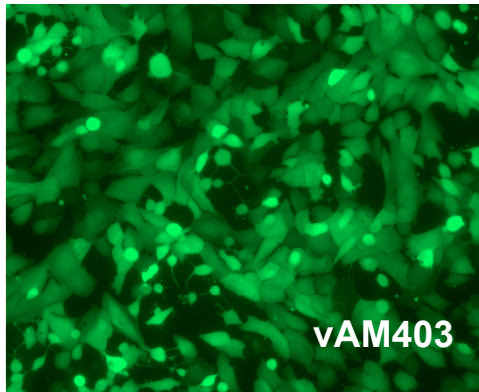

C.

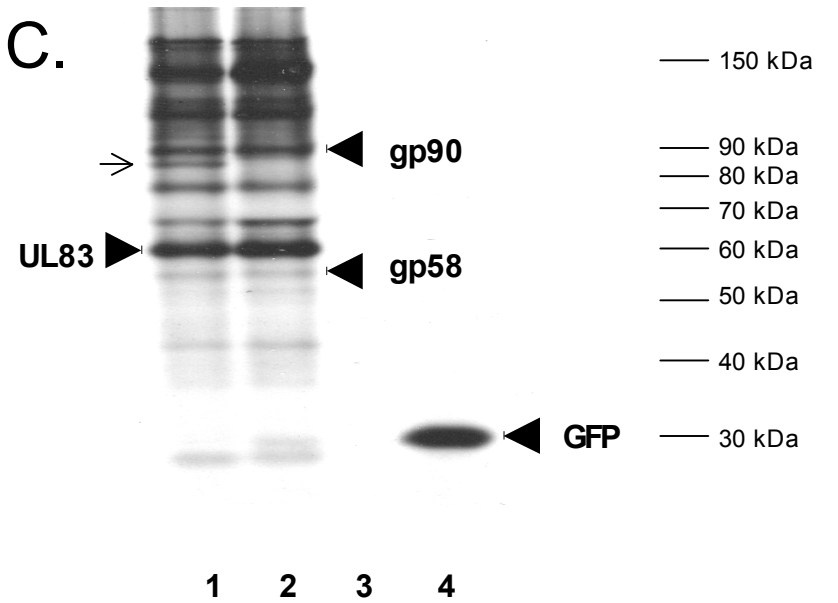

Supplement: MOESM1 [file 9607472]
